# Supplementary material for: Efficient stress-relaxation in InGaN/GaN light-emitting diodes using carbon nanotubes
Source: Royal Society of Chemistry journal article supplement (doi:10.1039/c5nr04239a), 2015-01-01
Supplement: c5nr04239a1.pdf [file c5nr04239a1.pdf]

## Supporting Information

# Efficient stress-relaxation in InGaN/GaN light-emitting diodes using carbon nanotubes

*Ah Hyun Park, †<sup>a</sup> Tae Hoon Seo, †<sup>b</sup> S. Chandramohan,<sup>a</sup> Gun Hee Lee,<sup>a</sup> Kyung Hyun Min,<sup>a</sup> Seula Lee,<sup>b</sup> Myung Jong Kim<sup>b</sup>, Yong Gyoo Hwang<sup>c</sup> and Eun-Kyung Suh<sup>\*a</sup>*

*<sup>a</sup>School of Semiconductor and Chemical Engineering, Semiconductor Physics Research Center, Chonbuk National University, Jeonju 561-756, South Korea*

*<sup>b</sup>Soft Innovative Materials Research Center, Korea Institute of Science and Technology, Jeonbuk 565-905, South Korea*

*<sup>c</sup>Division of Microelectronics and Display Technology, Wonkwang University, Iksan, Jeonbuk 570-749, Republic of Korea*

\* E-mail: eksuh@jbnu.ac.kr. †These authors contributed equally to this work

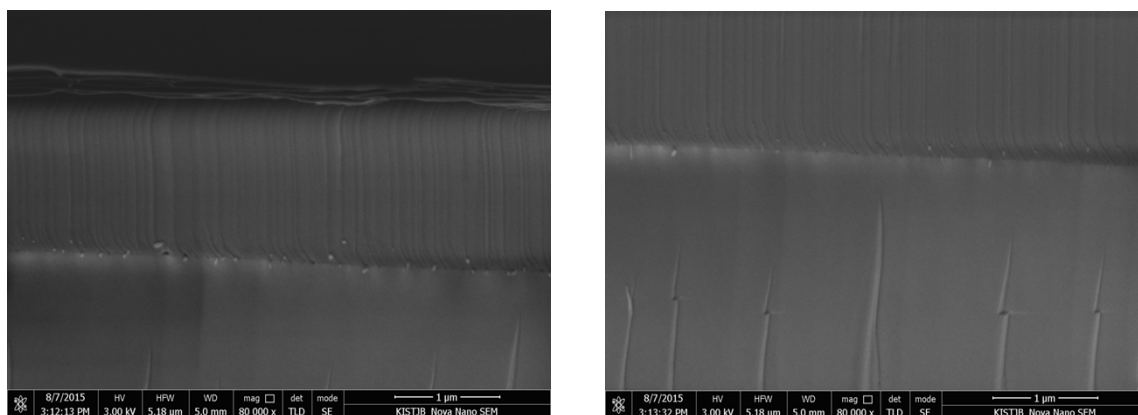

Figure S1. Cross-sectional FESEM images showing the interface of GaN/SWCNTs-coated sapphire.

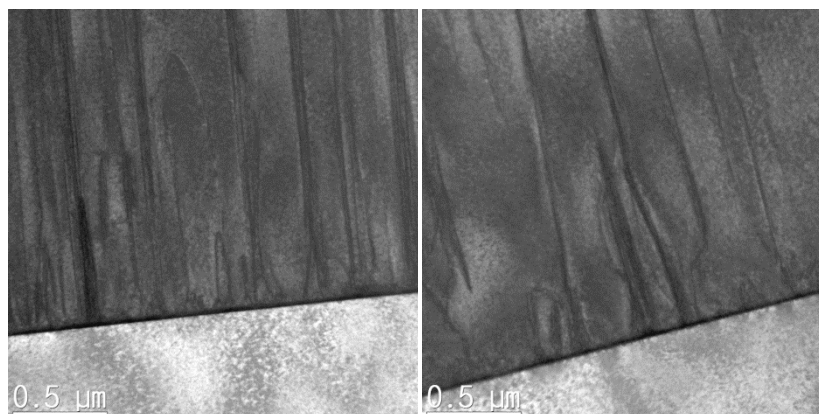

Figure S2. Cross-sectional HRTEM images of GaN at the very interface of (a) sapphire and (b) HD-SWCNTs/sapphire.

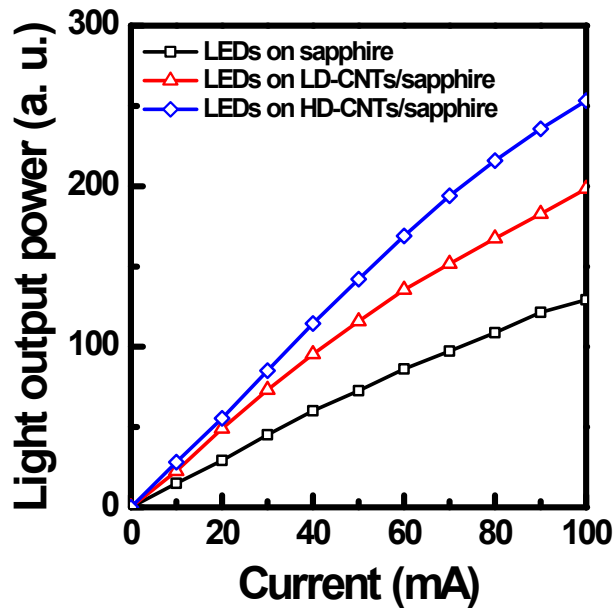

Figure S3. Light output power of the LEDs measured as a function of injection current. The measurements were performed at wafer scale on individual chips by keeping the distance of separation between the wafer and the photodetector constant for all the samples.
